# Supplementary material for: Comparative Proteomic Analysis of Gossypium thurberi in Response to Verticillium dahliae Inoculation
Source: PubMed Central journal article supplement (PMC4632794; doi:10.3390/ijms161025121), 2015-10-22
Supplement: ijms-16-25121-s001.pdf [file ijms-16-25121-s001.pdf]

## Supplementary Information

**Table S1.** The primer list of selected DEPs and endogenous gene used for qRT-PCR.

| No. | Gene ID (Gene Function)                                           | Forward Primer (5'→3') | Reverse Primer (5'→3')   |
|-----|-------------------------------------------------------------------|------------------------|--------------------------|
| 1   | Cotton_D_gene_10024930<br>(NBS-LRR-like protein 1)                | TTTGCCTCTGGAATCATTGTAC | AAACTTCTAGCCCTTCTTTGTG   |
| 2   | Cotton_D_gene_10027338<br>(NBS-LRR-like protein 2)                | TACAAAGCGAGGACCATAAACA | TACCGTCAAGTAACAAACAAGAGG |
| 3   | AF059484<br>(Cotton endogenous actin)                             | GATTCCGGTGACGGTGTTC    | TTCATCAAGGCATCGGTTAG     |
| 4   | VDAG10074<br>( <i>V. dahliae</i> endogenous tublin $\beta$ chain) | GACTTCCGTAACGGTTCGCT   | TTCTTGCTCTGGACGTTGCG     |

**Table S2.** GO annotation of identified proteins.

| Code | Biological Process                            | Number (%)    | Code | Molecular Function                                 | Number (%)    |
|------|-----------------------------------------------|---------------|------|----------------------------------------------------|---------------|
| 1    | Biological adhesion                           | 34 (0.13%)    | 1    | Antioxidant activity                               | 95 (1.23%)    |
| 2    | Biological regulation                         | 1403 (5.29%)  | 2    | Binding                                            | 3049 (39.42%) |
| 3    | Cellular component organization or biogenesis | 1391 (5.24%)  | 3    | Catalytic activity                                 | 3520 (45.51%) |
| 4    | Cellular process                              | 4146 (15.63%) | 4    | Channel regulator activity                         | 1 (0.01%)     |
| 5    | Developmental process                         | 1191 (4.49%)  | 5    | Electron carrier activity                          | 141 (1.82%)   |
| 6    | Establishment of localization                 | 1321 (4.98%)  | 6    | Enzyme regulator activity                          | 99 (1.28%)    |
| 7    | Growth                                        | 323 (1.22%)   | 7    | Metallochaperone activity                          | 1 (0.01%)     |
| 8    | Immune system process                         | 308 (1.16%)   | 8    | Molecular transducer activity                      | 54 (0.70%)    |
| 9    | Localization                                  | 1384 (5.22%)  | 9    | Nucleic acid binding transcription factor activity | 42 (0.54%)    |
| 10   | Locomotion                                    | 15 (0.06%)    | 10   | Nutrient reservoir activity                        | 15 (0.19%)    |
| 11   | Metabolic process                             | 4150 (15.65%) | 11   | Protein binding transcription factor activity      | 9 (0.12%)     |
| 12   | Multi-organism process                        | 599 (2.26%)   | 12   | Protein tag                                        | 1 (0.01%)     |
| 13   | Multicellular organismal process              | 1143 (4.31%)  | 13   | Receptor activity                                  | 23 (0.30%)    |
| 14   | Negative regulation of biological process     | 318 (1.20%)   | 14   | Structural molecule activity                       | 235 (3.04%)   |
| 15   | Positive regulation of biological process     | 274 (1.03%)   | 15   | Translation regulator activity                     | 2 (0.03%)     |
| 16   | Regulation of biological process              | 1257 (4.74%)  | 16   | Transporter activity                               | 448 (5.79%)   |
| 17   | Reproduction                                  | 647 (2.44%)   | -    | -                                                  | -             |
| 18   | Reproductive process                          | 621 (2.34%)   | -    | -                                                  | -             |
| 19   | Response to stimulus                          | 2364 (8.91%)  | -    | -                                                  | -             |
| 20   | Reproduction                                  | 647 (2.44%)   | -    | -                                                  | -             |
| 21   | Reproductive process                          | 621 (2.34%)   | -    | -                                                  | -             |
| 22   | response to stimulus                          | 2364 (8.91%)  | -    | -                                                  | -             |

**Table S3.** KEGG pathways of identified proteins in the response of *G. thurbri* to *V. dahliae*.

| No. | Pathways (ID)                                                   | Proteins with Annotation (4728) |
|-----|-----------------------------------------------------------------|---------------------------------|
| 1   | Metabolic pathways (ko01100)                                    | 1505 (31.83%)                   |
| 2   | Biosynthesis of secondary metabolites (ko01110)                 | 968 (20.47%)                    |
| 3   | Ribosome (ko03010)                                              | 199 (4.21%)                     |
| 4   | Protein processing in endoplasmic reticulum (ko04141)           | 172 (3.64%)                     |
| 5   | RNA transport (ko03013)                                         | 152 (3.21%)                     |
| 6   | Phenylpropanoid biosynthesis (ko00940)                          | 152 (3.21%)                     |
| 7   | Spliceosome (ko03040)                                           | 146 (3.09%)                     |
| 8   | Plant-pathogen interaction (ko04626)                            | 144 (3.05%)                     |
| 9   | Plant hormone signal transduction (ko04075)                     | 132 (2.79%)                     |
| 10  | Glycolysis/Gluconeogenesis (ko00010)                            | 128 (2.71%)                     |
| 11  | Starch and sucrose metabolism (ko00500)                         | 117 (2.47%)                     |
| 12  | Pyruvate metabolism (ko00620)                                   | 116 (2.45%)                     |
| 13  | Amino sugar and nucleotide sugar metabolism (ko00520)           | 115 (2.43%)                     |
| 14  | mRNA surveillance pathway (ko03015)                             | 114 (2.41%)                     |
| 15  | Oxidative phosphorylation (ko00190)                             | 106 (2.24%)                     |
| 16  | Purine metabolism (ko00230)                                     | 106 (2.2%)                      |
| 17  | Phenylalanine metabolism (ko00360)                              | 97 (2.05%)                      |
| 18  | Endocytosis (ko04144)                                           | 96 (2.03%)                      |
| 19  | Flavonoid biosynthesis (ko00941)                                | 96 (2.03%)                      |
| 20  | Phagosome (ko04145)                                             | 88 (1.86%)                      |
| 21  | Peroxisome (ko04146)                                            | 85 (1.8%)                       |
| 22  | Glutathione metabolism (ko00480)                                | 78 (1.65%)                      |
| 23  | RNA degradation(ko03018)                                        | 75 (1.59%)                      |
| 24  | Stilbenoid, diarylheptanoid and gingerol biosynthesis (ko00945) | 73 (1.54%)                      |
| 25  | Carbon fixation in photosynthetic organisms (ko00710)           | 72 (1.52%)                      |
| 26  | Ascorbate and aldarate metabolism (ko00053)                     | 68 (1.44%)                      |
| 27  | Citrate cycle (ko00020)                                         | 67 (1.42%)                      |
| 28  | Pyrimidine metabolism (ko00240)                                 | 67 (1.42%)                      |
| 29  | Galactose metabolism (ko00052)                                  | 66 (1.4%)                       |
| 30  | Proteasome (ko03050)                                            | 65 (1.37%)                      |
| 31  | Cysteine and methionine metabolism (ko00270)                    | 62 (1.31%)                      |
| 32  | Glycine, serine and threonine metabolism (ko00260)              | 61 (1.31%)                      |
| 33  | Flavone and flavonol biosynthesis (ko00944)                     | 60 (1.27%)                      |
| 34  | Arginine and proline metabolism (ko00330)                       | 58 (1.23%)                      |
| 35  | Ribosome biogenesis in eukaryotes (ko03008)                     | 57 (1.21%)                      |
| 36  | Glyoxylate and dicarboxylate metabolism (ko00630)               | 55 (1.16%)                      |
| 37  | Ubiquitin mediated proteolysis (ko04120)                        | 55 (1.16%)                      |
| 38  | Fatty acid metabolism (ko00071)                                 | 53 (1.12%)                      |
| 39  | Limonene and pinene degradation (ko00903)                       | 52 (1.1%)                       |
| 40  | Glycerophospholipid metabolism (ko00564)                        | 52 (1.1%)                       |

Table S3. *Cont.*

| No. | Pathways (ID)                                                 | Proteins with Annotation (4728) |
|-----|---------------------------------------------------------------|---------------------------------|
| 41  | Propanoate metabolism (ko00640)                               | 51 (1.08%)                      |
| 42  | Pentose and glucuronate interconversions(ko00040)             | 51 (1.08%)                      |
| 43  | Carotenoid biosynthesis (ko00906)                             | 51 (1.08%)                      |
| 44  | Zeatin biosynthesis (ko00908)                                 | 51 (1.08%)                      |
| 45  | Fructose and mannose metabolism (ko00051)                     | 50 (1.06%)                      |
| 46  | Diterpenoid biosynthesis (ko00904)                            | 50 (1.06%)                      |
| 47  | Aminoacyl-tRNA biosynthesis (ko00970)                         | 49 (1.04%)                      |
| 48  | Alanine, aspartate and glutamate metabolism (ko00250)         | 49 (1.04%)                      |
| 49  | Valine, leucine and isoleucine degradation (ko00280)          | 47 (0.99%)                      |
| 50  | SNARE interactions in vesicular transport (ko04130)           | 46 (0.97%)                      |
| 51  | Nitrogen metabolism (ko00910)                                 | 45 (0.95%)                      |
| 52  | Pentose phosphate pathway (ko00030)                           | 44 (0.93%)                      |
| 53  | Tyrosine metabolism (ko00350)                                 | 42 (0.89%)                      |
| 54  | Other glycan degradation (ko00511)                            | 42 (0.89%)                      |
| 55  | Glycerolipid metabolism (ko00561)                             | 42 (0.89%)                      |
| 56  | Fatty acid biosynthesis (ko00061)                             | 39 (0.82%)                      |
| 57  | ABC transporters (ko02010)                                    | 38 (0.8%)                       |
| 58  | $\beta$ -Alanine metabolism (ko00410)                         | 37 (0.78%)                      |
| 59  | alpha-Linolenic acid metabolism (ko00592)                     | 37 (0.78%)                      |
| 60  | Phenylalanine, tyrosine and tryptophan biosynthesis (ko00400) | 36 (0.76%)                      |
| 61  | Protein export (ko03060)                                      | 35 (0.74%)                      |
| 62  | Tryptophan metabolism (ko00380)                               | 35 (0.74%)                      |
| 63  | Terpenoid backbone biosynthesis (ko00900)                     | 35 (0.74%)                      |
| 64  | Cyanoamino acid metabolism (ko00460)                          | 35 (0.74%)                      |
| 65  | N-Glycan biosynthesis (ko00510)                               | 34 (0.72%)                      |
| 66  | Nucleotide excision repair (ko03420)                          | 34 (0.72%)                      |
| 67  | Porphyrin and chlorophyll metabolism(ko00860)                 | 33 (0.7%)                       |
| 68  | Sulfur metabolism (ko00920)                                   | 32 (0.68%)                      |
| 69  | Inositol phosphate metabolism (ko00562)                       | 32 (0.68%)                      |
| 70  | Sphingolipid metabolism (ko00600)                             | 31 (0.66%)                      |
| 71  | Valine, leucine and isoleucine biosynthesis (ko00290)         | 31 (0.66%)                      |
| 72  | Biosynthesis of unsaturated fatty acids(ko01040)              | 28 (0.59%)                      |
| 73  | Ubiquinone and other terpenoid-quinone biosynthesis (ko00130) | 28 (0.59%)                      |
| 74  | Butanoate metabolism (ko00650)                                | 27 (0.57%)                      |
| 75  | Phosphatidylinositol signaling system (ko04070)               | 26 (0.55%)                      |
| 76  | Cutin, suberine and wax biosynthesis(ko00073)                 | 26 (0.55%)                      |
| 77  | Pantothenate and CoA biosynthesis (ko00770)                   | 26 (0.55%)                      |
| 78  | Brassinosteroid biosynthesis (ko00905)                        | 25 (0.53%)                      |
| 79  | DNA replication (ko03030)                                     | 25 (0.53%)                      |
| 80  | Natural killer cell mediated cytotoxicity (ko04650)           | 24 (0.51%)                      |
| 81  | Isoflavonoid biosynthesis (ko00943)                           | 23 (0.49%)                      |
| 82  | Basal transcription factors (ko04650)                         | 23 (0.49%)                      |

**Table S3. Cont.**

| <b>No.</b> | <b>Pathways (ID)</b>                                             | <b>Proteins with Annotation (4728)</b> |
|------------|------------------------------------------------------------------|----------------------------------------|
| 83         | RNA polymerase (ko03020)                                         | 22 (0.47%)                             |
| 84         | Steroid biosynthesis (ko00100)                                   | 21 (0.44%)                             |
| 85         | Tropane, piperidine and pyridine alkaloid biosynthesis (ko00960) | 21 (0.44%)                             |
| 86         | Regulation of autophagy (ko04140)                                | 20 (0.42%)                             |
| 87         | Lysine degradation (ko00310)                                     | 20 (0.42%)                             |
| 88         | Glucosinolate biosynthesis (ko00966)                             | 20 (0.42%)                             |
| 89         | Selenocompound metabolism (ko00450)                              | 19 (0.4%)                              |
| 90         | Isoquinoline alkaloid biosynthesis (ko00950)                     | 19 (0.4%)                              |
| 91         | Mismatch repair (ko03430)                                        | 19 (0.4%)                              |
| 92         | Sesquiterpenoid and triterpenoid biosynthesis (ko00909)          | 19 (0.4%)                              |
| 93         | Histidine metabolism (ko00340)                                   | 18 (0.38%)                             |
| 94         | Riboflavin metabolism (ko00740)                                  | 17 (0.36%)                             |
| 95         | Benzoxazinoid biosynthesis (ko00402)                             | 17 (0.36%)                             |
| 96         | One carbon pool by folate (ko00670)                              | 17 (0.36%)                             |
| 97         | Vitamin B6 metabolism (ko00750)                                  | 17 (0.36%)                             |
| 98         | Lysine biosynthesis (ko00300)                                    | 16 (0.34%)                             |
| 99         | Glycosaminoglycan degradation (ko00531)                          | 15 (0.32%)                             |
| 100        | Photosynthesis (ko00195)                                         | 14 (0.3%)                              |
| 101        | Ether lipid metabolism (ko00565)                                 | 14 (0.3%)                              |
| 102        | Glycosphingolipid biosynthesis-ganglio series (ko00604)          | 13 (0.27%)                             |
| 103        | Circadian rhythm-plant (ko04712)                                 | 13 (0.27%)                             |
| 104        | Homologous recombination (ko03440)                               | 13 (0.27%)                             |
| 105        | Fatty acid elongation (ko00062)                                  | 12 (0.25%)                             |
| 106        | Thiamine metabolism (ko00730)                                    | 11 (0.23%)                             |
| 107        | Arachidonic acid metabolism (ko00590)                            | 10 (0.21%)                             |
| 108        | Base excision repair (ko03410)                                   | 9 (0.19%)                              |
| 109        | Glycosylphosphatidylinositol-anchor biosynthesis (ko00563)       | 9 (0.19%)                              |
| 110        | Nicotinate and nicotinamide metabolism (ko00760)                 | 9 (0.19%)                              |
| 111        | Glycosphingolipid biosynthesis-globo series (ko00603)            | 8 (0.17%)                              |
| 112        | Folate biosynthesis (ko00901)                                    | 8 (0.17%)                              |
| 113        | Indole alkaloid biosynthesis (ko00901)                           | 8 (0.17%)                              |
| 114        | Circadian rhythm - mammal (ko04710)                              | 7 (0.15%)                              |
| 115        | Sulfur relay system (ko04122)                                    | 7 (0.15%)                              |
| 116        | Linoleic acid metabolism (ko00591)                               | 6 (0.13%)                              |
| 117        | C5-Branched dibasic acid metabolism (ko00660)                    | 6 (0.13%)                              |
| 118        | Taurine and hypotaurine metabolism (ko00430)                     | 5 (0.11%)                              |
| 119        | Monoterpenoid biosynthesis (ko00902)                             | 5 (0.11%)                              |
| 120        | Synthesis and degradation of ketone bodies (ko00072)             | 5 (0.11%)                              |
| 121        | Lipoic acid metabolism (ko00785)                                 | 3 (0.06%)                              |
| 122        | Photosynthesis-antenna proteins (ko00196)                        | 3 (0.06%)                              |
| 123        | Caffeine metabolism (ko00232)                                    | 3 (0.06%)                              |
| 124        | Anthocyanin biosynthesis (ko00942)                               | 3 (0.06%)                              |

**Table S3. Cont.**

| No. | Pathways (ID)                                  | Proteins with Annotation (4728) |
|-----|------------------------------------------------|---------------------------------|
| 125 | Other types of O-glycan biosynthesis (ko00514) | 3 (0.06%)                       |
| 126 | Biotin metabolism (ko00780)                    | 3 (0.06%)                       |
| 127 | Non-homologous end-joining (ko03450)           | 2 (0.04%)                       |
| 128 | Betalain biosynthesis (ko00965)                | 1 (0.02%)                       |

**Table S4.** COG annotation of differentially expressed proteins in the response of *G. thurbri* to *V. dahliae*.

| Code     | Functional Categories                                      | Up-Regulated |                                                                                                                                                                                                                                                                                                                              | Down-Regulated |                                                                                                                                                                                                                             |
|----------|------------------------------------------------------------|--------------|------------------------------------------------------------------------------------------------------------------------------------------------------------------------------------------------------------------------------------------------------------------------------------------------------------------------------|----------------|-----------------------------------------------------------------------------------------------------------------------------------------------------------------------------------------------------------------------------|
|          |                                                            | NO.          | Proteins                                                                                                                                                                                                                                                                                                                     | NO.            | Proteins                                                                                                                                                                                                                    |
| <b>A</b> | RNA processing and modification                            | 3            | Cotton_D_gene_ (10018551, 10012904, 10021434)                                                                                                                                                                                                                                                                                | 0              |                                                                                                                                                                                                                             |
| <b>B</b> | Chromatin structure and dynamics                           | 2            | Cotton_D_gene_ (10010397, 10020008)                                                                                                                                                                                                                                                                                          | 1              | Cotton_D_gene_ (10018053)                                                                                                                                                                                                   |
| <b>C</b> | Energy production and conversion                           | 30           | Cotton_D_gene_ ( 10012848, 10005039, 10019449, 10011069, 10033427, 10016342, 10007690, 10013278, 10007768, 10032002, 10022441, 10027891, 10006598, 10009473, 10039426, 10006669, 10001134, 10010340, 10013559, 10024930, 10006372, 10013854, 10033966, 10012145, 10019443, 10017916, 10006681, 10029472, 10028958, 10005804) | 20             | Cotton_D_gene_ (10013210, 10034808, 10034785, 10012804, 10022946, 10003001, 10012805, 10032799, 10005271, 10017991, 10024137, 10002038, 10025211 <sup>2</sup> , 10020109, 10008020, 10026306, 10015835, 10038294, 10010827) |
| <b>D</b> | Cell cycle control, cell division, chromosome partitioning | 3            | Cotton_D_gene_ ( 10024874, 10028350, 10036218 )                                                                                                                                                                                                                                                                              | 1              | Cotton_D_gene_ (10006863)                                                                                                                                                                                                   |
| <b>E</b> | Amino acid transport and metabolism                        | 17           | Cotton_D_gene_ (10008366, 10038278, 10006548, 10011215, 10030583, 10030827, 10014175, 10011579, 10002405, 10037613, 10039595, 10021143, 10033386, 10010080, 10003328, 10017407, 10006706 )                                                                                                                                   | 8              | Cotton_D_gene_ (10010624, 10023991, 10005953, 10039289, 10002601 <sup>2</sup> , 10036043, 10033114)                                                                                                                         |
| <b>F</b> | Nucleotide transport and metabolism                        | 6            | Cotton_D_gene_ (10019245, 10019245, 10016671, 10008436, 10028401, 10003328)                                                                                                                                                                                                                                                  | 5              | Cotton_D_gene_ (10025910, 10021402, 10022797, 10016840, 10004476)                                                                                                                                                           |

Table S4. Cont.

| Code | Functional Categories                           | Up-Regulated |                                                                                                                                                                                                                                                                                                                                                                                                                                                                                 | Down-Regulated |                                                                                                                                                                                                                                                                                     |
|------|-------------------------------------------------|--------------|---------------------------------------------------------------------------------------------------------------------------------------------------------------------------------------------------------------------------------------------------------------------------------------------------------------------------------------------------------------------------------------------------------------------------------------------------------------------------------|----------------|-------------------------------------------------------------------------------------------------------------------------------------------------------------------------------------------------------------------------------------------------------------------------------------|
|      |                                                 | NO.          | Proteins                                                                                                                                                                                                                                                                                                                                                                                                                                                                        | NO.            | Proteins                                                                                                                                                                                                                                                                            |
| G    | Carbohydrate transport and metabolism           | 38           | Cotton_D_gene_ (10037302, 10028839, 10019372, 10028072, 10033809 <sup>2</sup> , 10021342, 10036658, 10018308, 10023391, 10027067, 10030859, 10001552, 10026767, 10039910, 10028824, 10031457, 10030697 <sup>2</sup> , 10002267, 10010080, 10017109, 10034052, 10012361, 10028199, 10038047, 10007128, 10018311, 10039697, 10004043, 10028958, 10015205, 10036722, 10033043, 10030188, 10022459, 10030973, 10005446)                                                             | 14             | Cotton_D_gene_ (10009326, 10000731, 10035883, 10009762, 10024264, 10010917, 10037042 <sup>2</sup> , 10032629, 10035029, 10032837, 10020245, 10019562, 10012877)                                                                                                                     |
| H    | Coenzyme transport and metabolism               | 15           | Cotton_D_gene_ (10035451, 10028579, 10012197, 10038278, 10025336, 10030618, 10008985, 10007695, 10010080 <sup>2</sup> , 10006256, 10006066, 10023708, 10006706 <sup>2</sup> )                                                                                                                                                                                                                                                                                                   | 6              | Cotton_D_gene_ (10033904, 10000259, 10034561, 10002038, 10002601, 10012377)                                                                                                                                                                                                         |
| I    | Lipid transport and metabolism                  | 15           | Cotton_D_gene_ (10033223, 10031714, 10032002 <sup>4</sup> , 10039426, 10033275, 10005437, 10027411, 10022996, 10001266, 10010703, 10028954, 10021255 )                                                                                                                                                                                                                                                                                                                          | 12             | Cotton_D_gene_ (10036532, 10025264, 10031203, 10024137, 10025265, 10026834, 10001038, 10037075, 10016847, 10015335, 10020104, 10015042)                                                                                                                                             |
| J    | Translation, ribosomal structure and biogenesis | 45           | Cotton_D_gene_ (10004494, 10027779, 10004220, 10029670, 10012775, 10011816, 10040569, 10039949 <sup>2</sup> , 10005997, 10000340, 10004694, 10006894, 10032085, 10002744, 10035490, 10010478, 10003555, 10021405, 10026406, 10013181, 10003908, 10033079, 10019660, 10022895, 10038655, 10005672, 10005537, 10009175, 10025349, 10015425 <sup>2</sup> , 10038010, 10025559, 10039147, 10012502, 10035550, 10030292, 10016717, 10027196, 10025656, 10018151, 10016925, 10006046) | 26             | Cotton_D_gene_ (10020726, 10019584, 10022886, 10015027, 10020493, 10000394, 10035254, 10006931, 10028826, 10022637, 10017767, 10021366, 10023027, 10022284, 10009428, 10032067, 10019410, 10010148, 10020492, 10001782, 10033867, 10021472, 10030291, 10018270, 10027511, 10020964) |
| K    | Transcription                                   | 7            | Cotton_D_gene_ (10024874, 10020211, 10003392, 10033732, 10004346, 10006723, 10010164)                                                                                                                                                                                                                                                                                                                                                                                           | 14             | Cotton_D_gene_ (10031155, 10000861, 10011464, 10001782, 10003287, 10000620, 10035231, 10021472, 10007924 <sup>2</sup> , 10021957, 10010182, 10012031, 10008746)                                                                                                                     |

Table S4. Cont.

| Code | Functional Categories                                        | Up-Regulated |                                                                                                                                                                                                                                                                                                                                                                                 | Down-Regulated |                                                                                                                                                                                                                                                                 |
|------|--------------------------------------------------------------|--------------|---------------------------------------------------------------------------------------------------------------------------------------------------------------------------------------------------------------------------------------------------------------------------------------------------------------------------------------------------------------------------------|----------------|-----------------------------------------------------------------------------------------------------------------------------------------------------------------------------------------------------------------------------------------------------------------|
|      |                                                              | NO.          | Proteins                                                                                                                                                                                                                                                                                                                                                                        | NO.            | Proteins                                                                                                                                                                                                                                                        |
| L    | Replication, recombination and repair                        | 6            | Cotton_D_gene_ (10024874, 10033732, 10004346, 10006723, 10029307, 10010164 )                                                                                                                                                                                                                                                                                                    | 2              | Cotton_D_gene_ (10001782, 10021472)                                                                                                                                                                                                                             |
| M    | Cell wall/membrane/envelope biogenesis                       | 21           | Cotton_D_gene_ (10037302, 10026791, 10039005, 10022541, 10011093, 10033809 <sup>2</sup> , 10019860, 10036658, 10039012, 10015145, 10030618, 10008985, 10015271, 10002267, 10003140, 10034052, 10034771, 10007128, 10016566, 10033043)                                                                                                                                           | 7              | Cotton_D_gene_ (10000731, 10035883, 10000259, 10037042 <sup>2</sup> , 10013325, 10008902)                                                                                                                                                                       |
| N    | Cell motility                                                | 0            |                                                                                                                                                                                                                                                                                                                                                                                 | 1              | Cotton_D_gene_ (10034230 )                                                                                                                                                                                                                                      |
| O    | Posttranslational modification, protein turnover, chaperones | 35           | Cotton_D_gene_ (10032487, 10010440, 10032208, 10002753, 10025340, 10012471, 10036137, 10011573, 10025013, 10038223, 10018001 <sup>2</sup> , 10002643, 10033427, 10016342, 10010034, 10007690, 10039030, 10003365, 10006598, 10006598, 10004913, 10037266, 10022952, 10023691, 10029813 <sup>2</sup> , 10032203, 10010086, 10017916, 10032501 <sup>2</sup> , 10021434, 10025870) | 24             | Cotton_D_gene_ (10017225, 10008783, 10017886, 10039046, 10038649, 10019135, 10011190, 10011199, 10028684, 10011182, 10011183, 10011191, 10013208, 10023402, 10006562, 10035894, 10031521, 10021857, 10013391, 10016982, 10001782, 10038294, 10026358, 10010827) |
| P    | Inorganic ion transport and metabolism                       | 6            | Cotton_D_gene_ (10039610, 10000469, 10026942, 10022908, 10008648, 10003600)                                                                                                                                                                                                                                                                                                     | 6              | Cotton_D_gene_ (10006229, 10020245 <sup>2</sup> , 10034136, 10036058, 10003071)                                                                                                                                                                                 |
| Q    | Secondary metabolites biosynthesis, transport and catabolism | 13           | Cotton_D_gene_ (10018639, 10029746, 10031714, 10014089, 10023571, 10000279, 10030618, 10008985, 10029748, 10028954, 10006681, 10006706, 10021255)                                                                                                                                                                                                                               | 19             | Cotton_D_gene_ (10034112, 10005900, 10006923, 10038440, 10033018, 10000259, 10025264, 10031203, 10025265, 10031935, 10011253, 10027616, 10017861, 10036997, 10000588, 10028992, 10026694, 10020104, 10018053)                                                   |

Table S4. Cont.

| Code     | Functional Categories                                         | Up-Regulated |                                                                                                                                                                                                                                                                                                                                                                                                                                                                                                                                                                                     | Down-Regulated |                                                                                                                                                                                                                                                                                                                   |
|----------|---------------------------------------------------------------|--------------|-------------------------------------------------------------------------------------------------------------------------------------------------------------------------------------------------------------------------------------------------------------------------------------------------------------------------------------------------------------------------------------------------------------------------------------------------------------------------------------------------------------------------------------------------------------------------------------|----------------|-------------------------------------------------------------------------------------------------------------------------------------------------------------------------------------------------------------------------------------------------------------------------------------------------------------------|
|          |                                                               | NO.          | Proteins                                                                                                                                                                                                                                                                                                                                                                                                                                                                                                                                                                            | NO.            | Proteins                                                                                                                                                                                                                                                                                                          |
| <b>R</b> | General function prediction only                              | 54           | Cotton_D_gene_ (10005039, 10040312, 10038273, 10005890, 10034401, 10015444, 10029450, 10016775, 10018458, 10014089, 10034022, 10027891 <sup>2</sup> , 10009473, 10019851, 10016445, 10018137, 10024874, 10024874, 10028350, 10020278, 10030618, 10017137, 10008985, 10004109, 10014921, 10009563, 10010080, 10000976, 10033732, 10004346, 10034052, 10015382, 10035884, 10018331, 10011559, 10029623, 10004024, 10019443, 10006723, 10006681 <sup>2</sup> , 10004043, 10017407, 10006066, 10016537, 10001937, 10010164, 10003972, 10015985, 10021434, 10004308, 10003385, 10021762) | 29             | Cotton_D_gene_ (10013210, 10025048, 10021040, 10022821, 10038440, 10022946, 10032264, 10000259, 10025264, 10031699, 10031203, 10040650, 10025265, 10025211, 10029866, 10016669, 10034350, 10030133, 10039970, 10003042, 10010876, 10036958, 10025176, 10035783, 10011552, 10004548, 10028992, 10022060, 10032980) |
| <b>S</b> | Function unknown                                              | 5            | Cotton_D_gene_ (10020440, 10022964, 10031677, 10002127, 10033570 )                                                                                                                                                                                                                                                                                                                                                                                                                                                                                                                  | 4              | Cotton_D_gene_ (10004276, 10024291, 10015806, 10009346 )                                                                                                                                                                                                                                                          |
| <b>T</b> | Signal transduction mechanisms                                | 17           | Cotton_D_gene_ (10035405, 10011661, 10011672, 10022271 <sup>3</sup> , 10024874, 10024874, 10028350, 10005348, 10033732, 10004346, 10012904, 10006723, 10011886, 10010164, 10013517)                                                                                                                                                                                                                                                                                                                                                                                                 | 3              | Cotton_D_gene_ (10040577, 10027129, 10000390)                                                                                                                                                                                                                                                                     |
| <b>U</b> | Intracellular trafficking, secretion, and vesicular transport | 9            | Cotton_D_gene_ (10029348, 10018287, 10007441, 10016587, 10040618, 10024449, 10036216, 10021434, 10009632)                                                                                                                                                                                                                                                                                                                                                                                                                                                                           | 8              | Cotton_D_gene_ (10039289, 10031886, 10006309, 10013391, 10010757, 10016982, 10015777, 10016847)                                                                                                                                                                                                                   |
| <b>V</b> | Defense mechanisms                                            | 1            | Cotton_D_gene_ (10033155 )                                                                                                                                                                                                                                                                                                                                                                                                                                                                                                                                                          | 0              |                                                                                                                                                                                                                                                                                                                   |
| <b>Z</b> | Cytoskeleton                                                  | 7            | Cotton_D_gene_ (10032154, 10003749, 10021918, 10003751, 10024874, 10028350, 10036218)                                                                                                                                                                                                                                                                                                                                                                                                                                                                                               | 0              |                                                                                                                                                                                                                                                                                                                   |
